# Supplementary material for: Preferential lipolysis of DGAT1 over DGAT2 generated triacylglycerol in Huh7 hepatocytes
Source: bioRxiv or medRxiv preprint supplement (doi:10.1101/2021.06.18.449045), 2021-06-18

**Supplemental Table S1. Primers used for quantitative PCR analysis**

| S.No | Gene          | Primers                                |
|------|---------------|----------------------------------------|
| 1    | <i>ABHD5</i>  | F: 5'- TTTAAGTCTAGTGCAGCGTTT – 3'      |
|      |               | R: 5'- GCATTTTACCAATTCGCTGGA – 3'      |
| 2    | <i>ACOX1</i>  | F: 5'- TTTGAGGGAGAAAACACTGTCA – 3'     |
|      |               | R: 5'- CCTGAGTGCACCTGATCATAAC – 3'     |
| 3    | <i>BCSL2</i>  | F: 5'- ATCTCCACTTCTTCGCGTTC – 3'       |
|      |               | R: 5'- CCAAATAGCAGGAGGCTAGAGA – 3'     |
| 4    | <i>CPT1A</i>  | F: 5'- CCTCCGTAGCTGACTCGGTA – 3'       |
|      |               | R: 5'- CGGAGTGACCGTGAAGTGA – 3'        |
| 5    | <i>PPIA</i>   | F: 5'- TCCAAAGACAGCAGAAAACCTTTCG – 3'  |
|      |               | R: 5'- TCTTCTTGCTGGTCTTGCCATTCC – 3'   |
| 6    | <i>DGAT1</i>  | F: 5'- GTCCCAGGACTGCACCAG – 3'         |
|      |               | R: 5'- CTCCCCTCACACCACCAG – 3'         |
| 7    | <i>DGAT2</i>  | F: 5'- TCGAGACTACTTTCCCATCCA – 3'      |
|      |               | R: 5'- GGTGGTATCCAAAGATATAGTTCCTG – 3' |
| 8    | <i>FASN</i>   | F: 5'- CAAGTGCACGGTGTTCAT – 3'         |
|      |               | R: 5'- CTTCCCTTGGGCCATGTAG – 3'        |
| 9    | <i>FITM2</i>  | F: 5'- AACAAGCGCAACGTCCTC – 3'         |
|      |               | R: 5'- TGGTAGTTGGTGAGGGCAAT – 3'       |
| 10   | <i>PLIN2</i>  | F: 5'- GCTGCAGTCCGTCGATTT – 3'         |
|      |               | R: 5'- CACCCGAGTCACCACACTC – 3'        |
| 11   | <i>PLIN5</i>  | F: 5'- CTTGAACACATGGACAAAGAGG – 3'     |
|      |               | R: 5'- TCAAGTTGGCCTGAATAGGG – 3'       |
| 12   | <i>SCD</i>    | F: 5'- CCTAGAAGCTGAGAACTGGTGA – 3'     |
|      |               | R: 5'- ACATCATCAGCAAGCCAGGT – 3'       |
| 13   | <i>SREBF1</i> | F: 5'- CGGAGCCATGGATTGCACTT – 3'       |
|      |               | R: 5'- TCAAATAGGCCAGGGGAAGTCAC – 3'    |

## Supplemental Data

### **Figure S1: mRNA expression of genes encoding LD maturation factors**

Huh7 hepatocytes were incubated with/without 0.4 mM OA/0.5% BSA in the presence/absence of DGAT inhibitors for 4 h. Relative mRNA expression of *BSCL2* and *FITM2* encoding LD maturation factors SEIPIN and FIT2 (Fat storage-inducing transmembrane protein 2). Data are presented as the ratio of expression of a given gene to *PPIA* (cyclophilin).

### **Figure S2: ATGL, CGI-58 and PLIN2 protein expression**

Huh7 hepatocytes were preincubated for 1 h with serum free DMEM incubated in the presence/absence of DGAT inhibitors followed by 4 h treatment with 0.4 mM OA/0.5% BSA and DGAT inhibitors in the presence/absence of lipase inhibitor E600. Immunoblot analysis of LD proteins, PLIN2, ATGL, ABHD5/CGI58, and GAPDH (loading control) were performed in total cell lysates.

### **Figure S3: LD localization of ATGL-EGFP and co-localization of ATGL-EGFP and ABHD5/CGI58-mCherry**

(A) Huh7 hepatocytes were transfected with ATGL-EGFP and incubated with 0.4 mM OA/0.5% BSA for 4 h.

(B) Huh7 hepatocytes were co-transfected with ATGL-EGFP and ABHD5/CGI58-mCherry and incubated with 0.4mM OA/0.5% BSA for 4 h.

### **Figure S4: Co-localization of ATGL and PLIN5**

(A) Huh7 hepatocytes were co-transfected with ATGL-EGFP and PLIN5-mCherry and incubated with 0.4mM OA/0.5% BSA for 4 h.

# Supplementary Figures

Figure S1

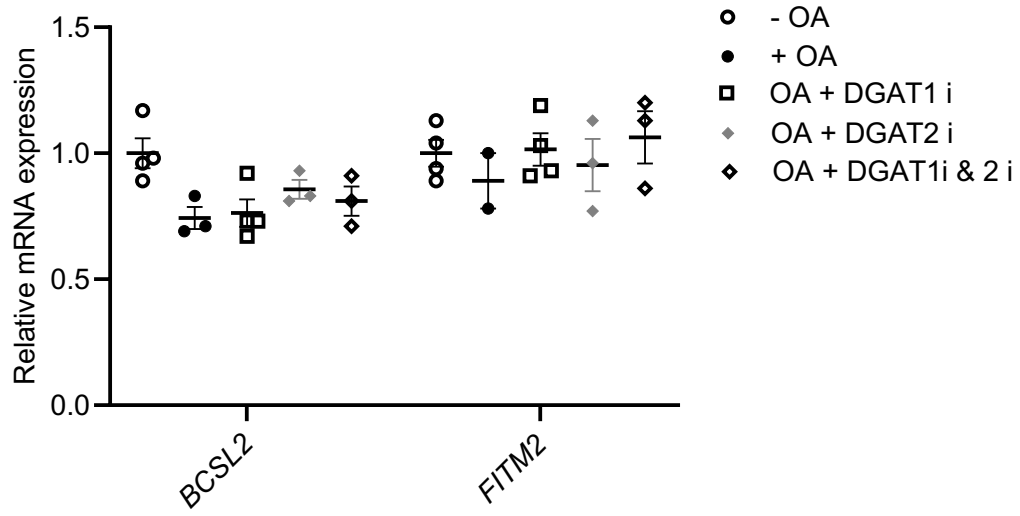

Figure S2

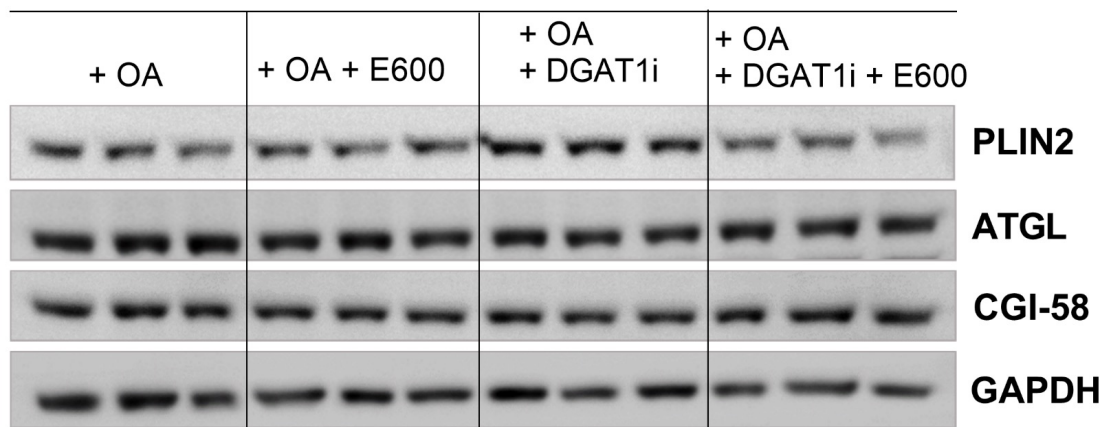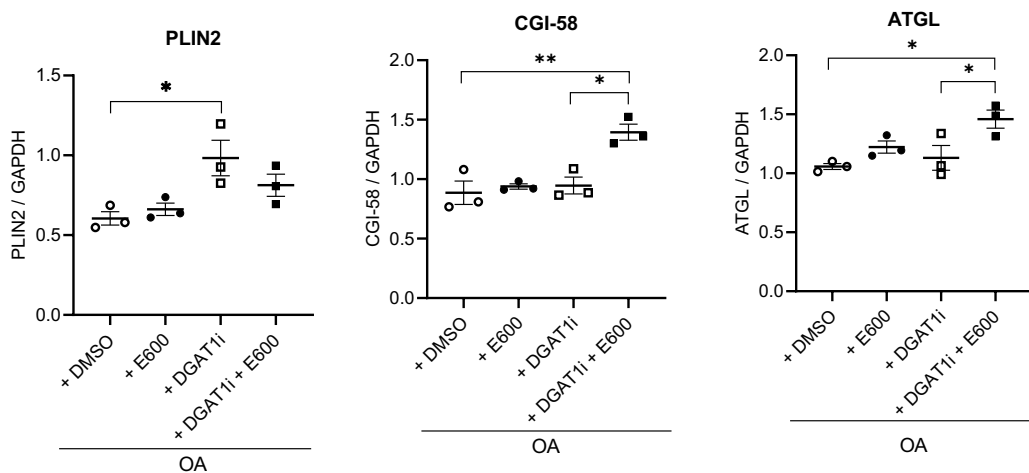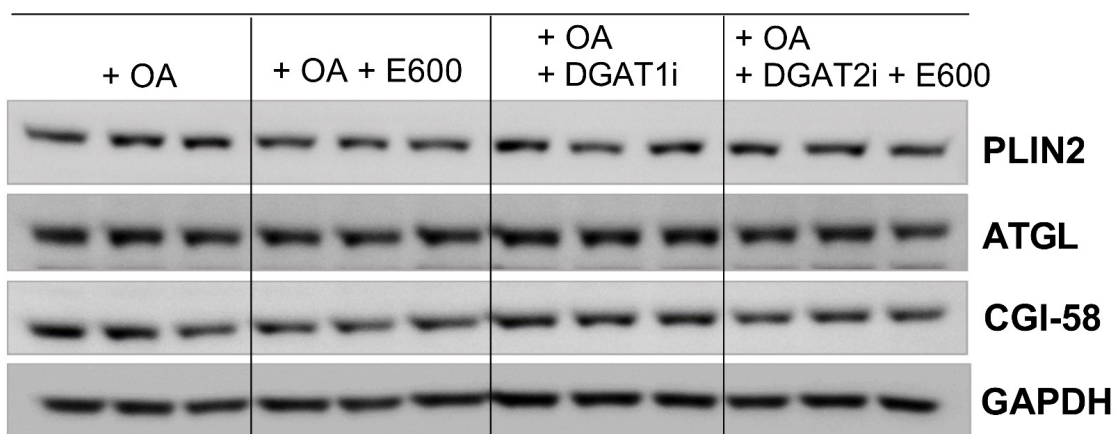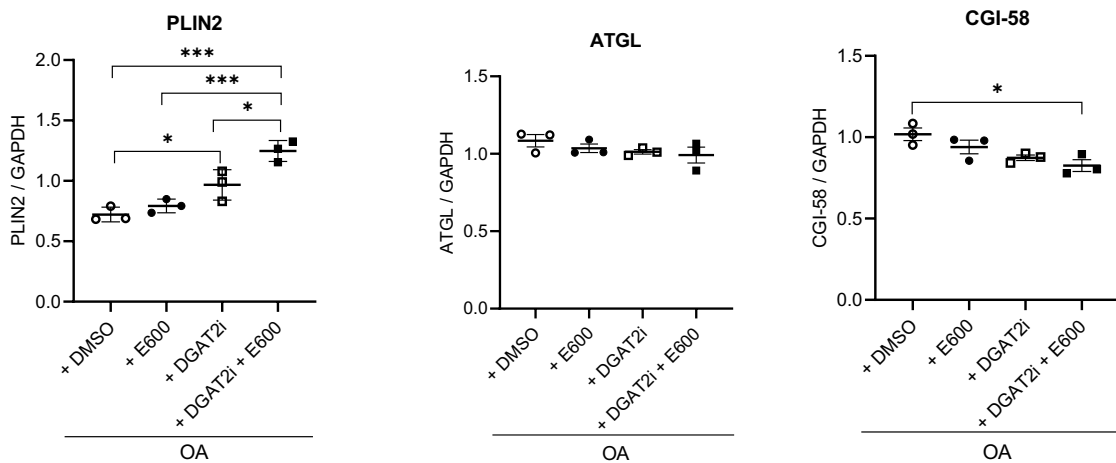

Figure S3

A

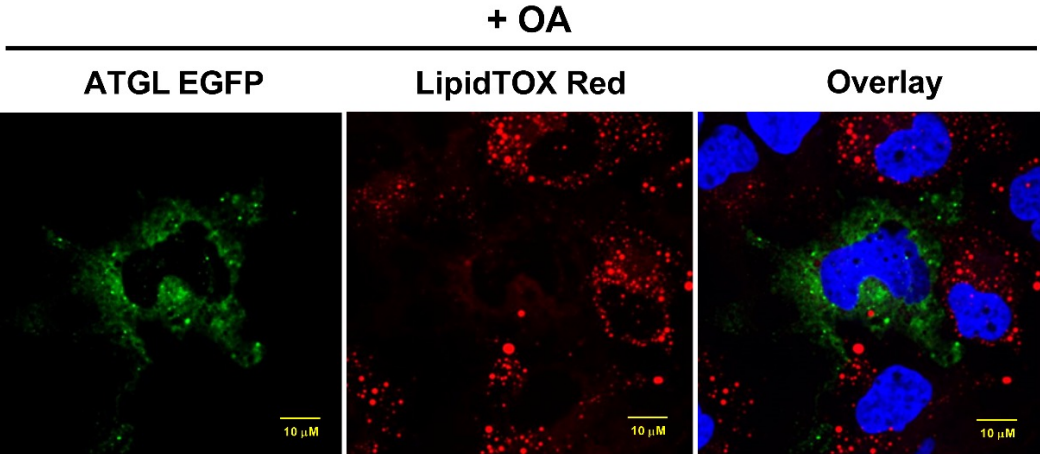

B

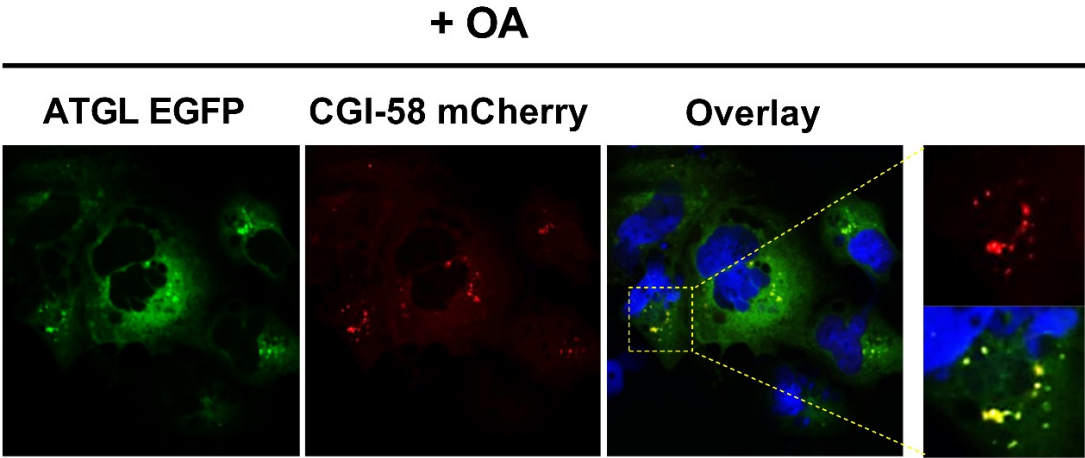

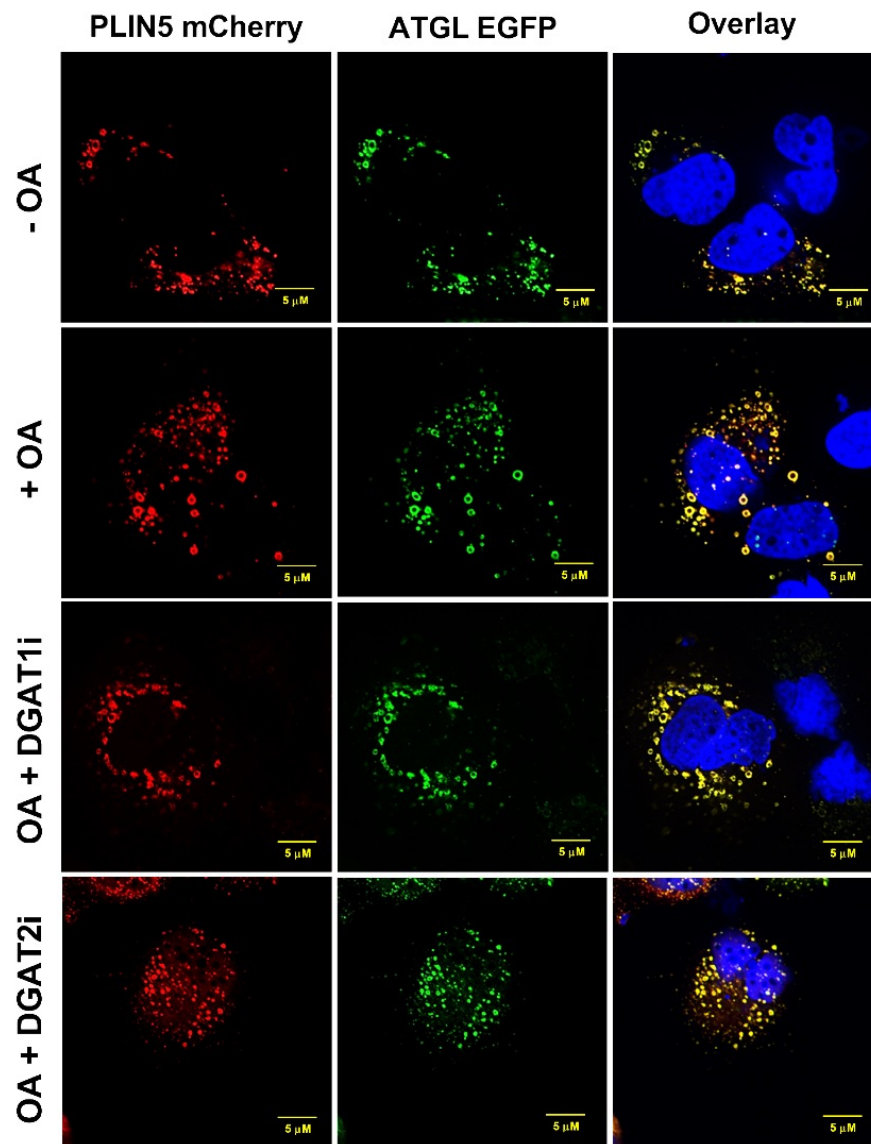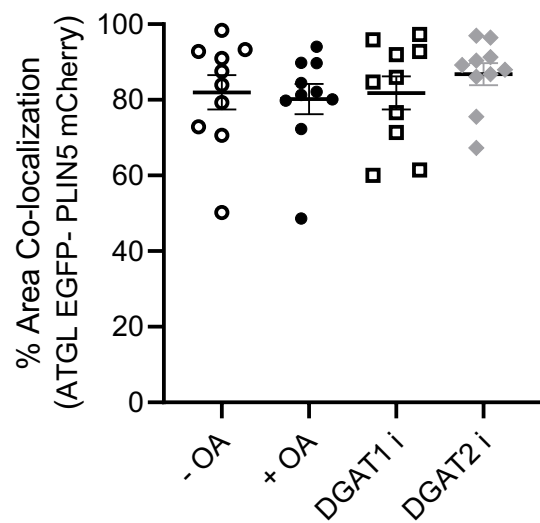

Supplement: Supplementary file [file media-1.pdf]
